# Supplementary material for: Physiologically Based Pharmacokinetic Modeling to Predict Human Pharmacokinetics of a Novel Mithramycin Analog for Ewing Sarcoma
Source: Research Square preprint supplement (doi:10.21203/rs.3.rs-9488905/v1), 2026-04-23
Supplement: Supplementary file 1 [file de2a8ba75d2a01805c75631f.docx]

**Supplementary Materials**


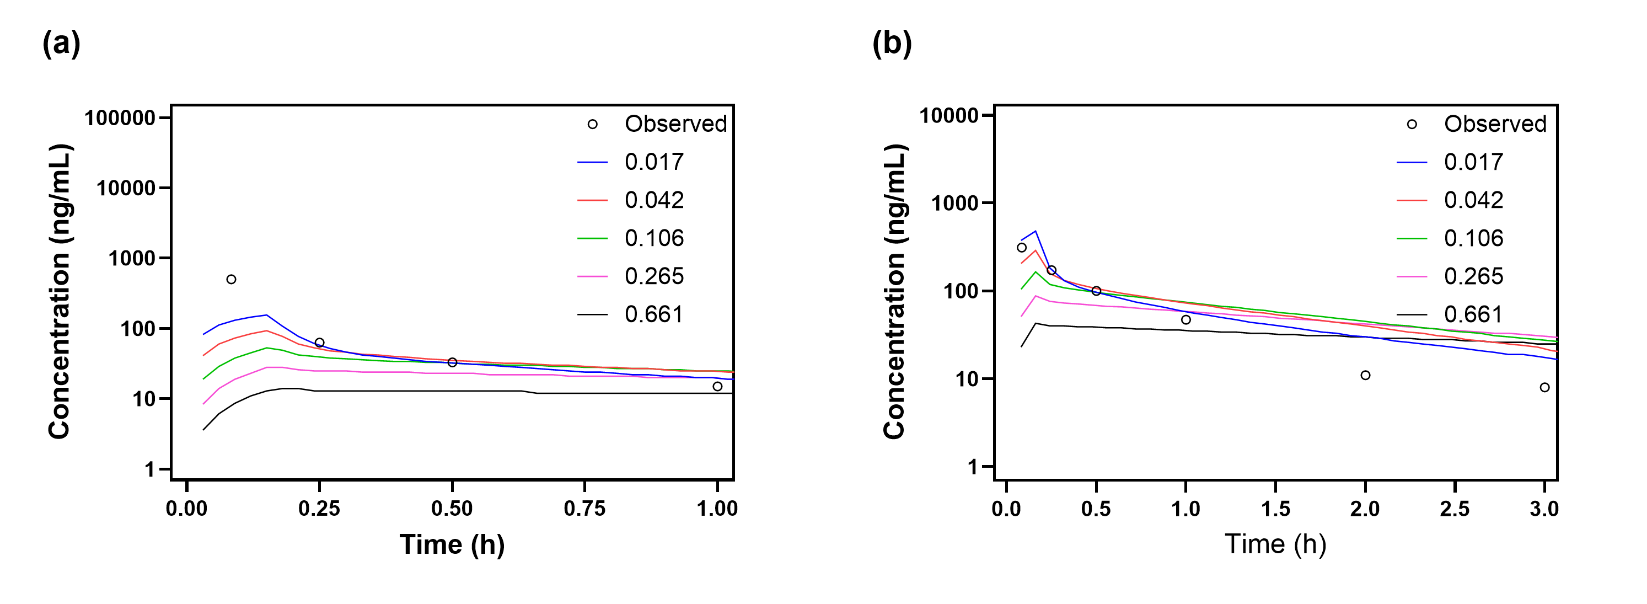


**Fig. S1.** Sensitivity analysis of BPR on MTMSA-Trp monkey PBPK model prediction at (a) 1.34 µg/kg and (b) 4.19 µg/kg following 10-minute IV infusion. Solid lines and circles are the PBPK predictions and observations, respectively.

**Table S1.** Predictive performance of the MTM PBPK model for human plasma PK using three clearance prediction methods.

| **CL prediction method** | **AUC** | | | **Concentration** | |
| --- | --- | --- | --- | --- | --- |
| **AUCObs (ng/mL.h)** | **AUCPred (ng/mL.h)** | **AUCPred/Obs Ratio** | **AFE** | **RMSE** |
| Additional clearance | 136 | 143 | 1.05 | 0.52 | 0.61 |
| Allometric scaling | 136 | 1482 | 10.9 | 10.66 | 1.06 |
| Single species scaling | 136 | 856 | 6.29 | 6.51 | 0.84 |

Note: AUCs were calculated using extracted or predicted concentrations for 24 hours following the first dose. AFE and RMSE were calculated using extracted or predicted concentration-time points across the 7-day dosing period.

**
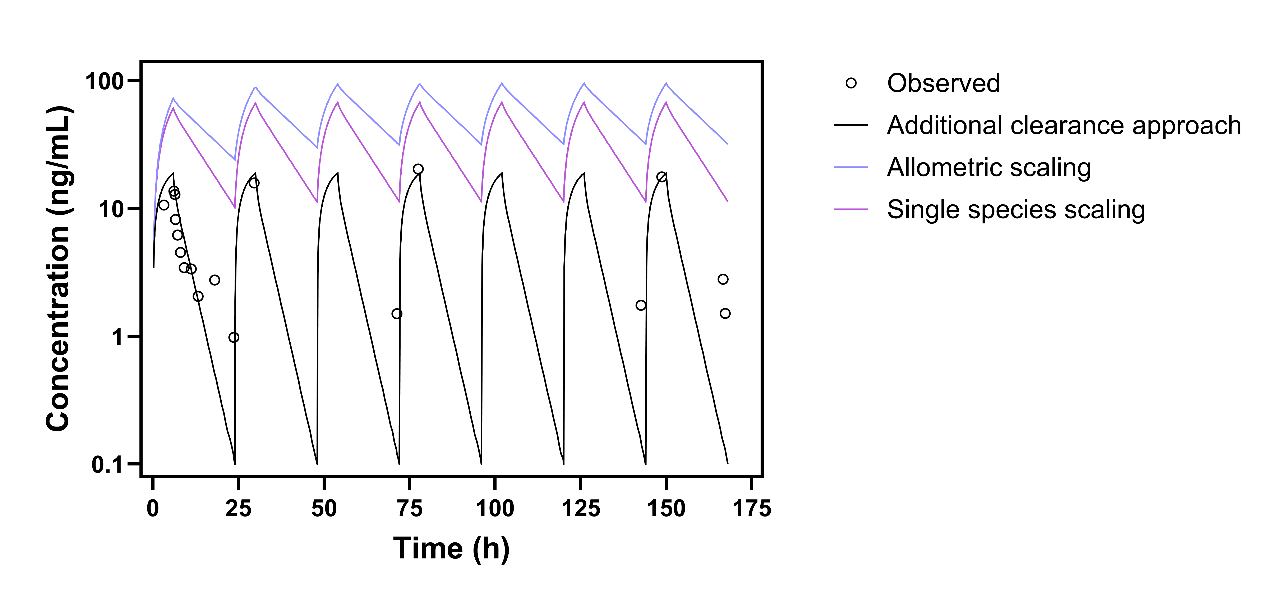
**

**Fig. S2.** Human MTM plasma PK predictions using three clearance prediction methods (solid lines) compared with observed clinical plasma PK (open circles).


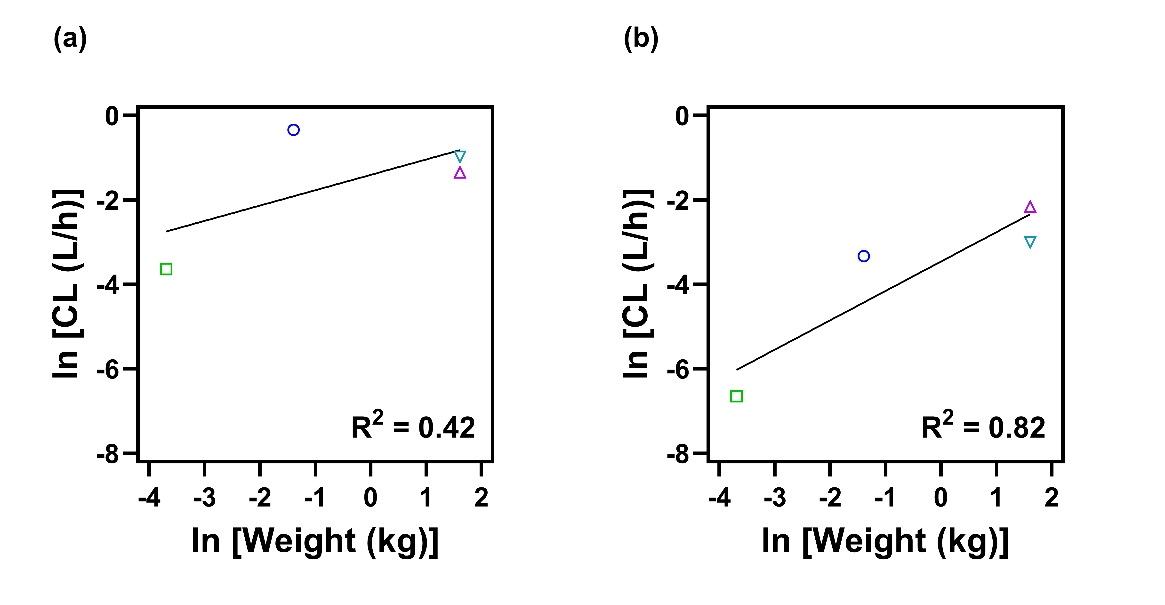


**Fig. S3.** Human clearance projections of (a) MTM and (b) MTMSA-Trp using allometric scaling. Symbols represent species body weights and solid lines represent linear regression fit.

**
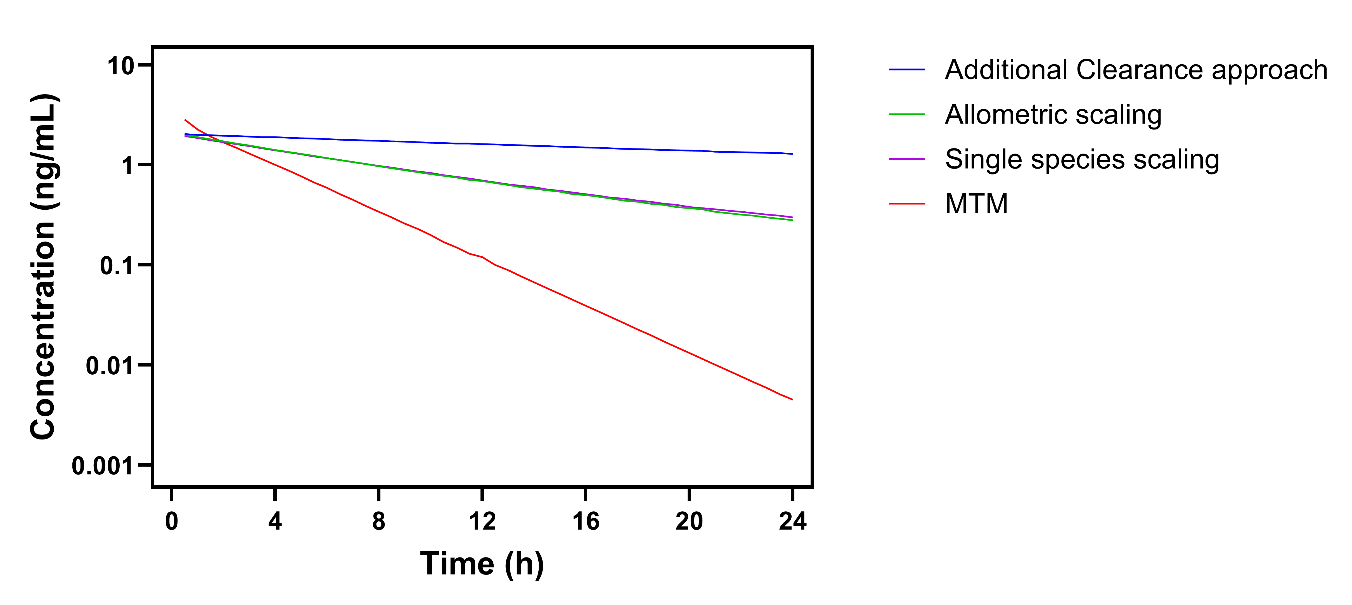
**

**Fig. S4.** Exploratory human liver concentration-time profiles of MTMSA-Trp and MTM generated by PBPK modeling. MTMSA-Trp liver profiles were projected using three human clearance prediction methods and compared with the MTM liver profile generated with the additional clearance approach. PBPK simulations were conducted at a single 13 µg/kg IV bolus dose in a 13-year-old, 50-kg male.

**
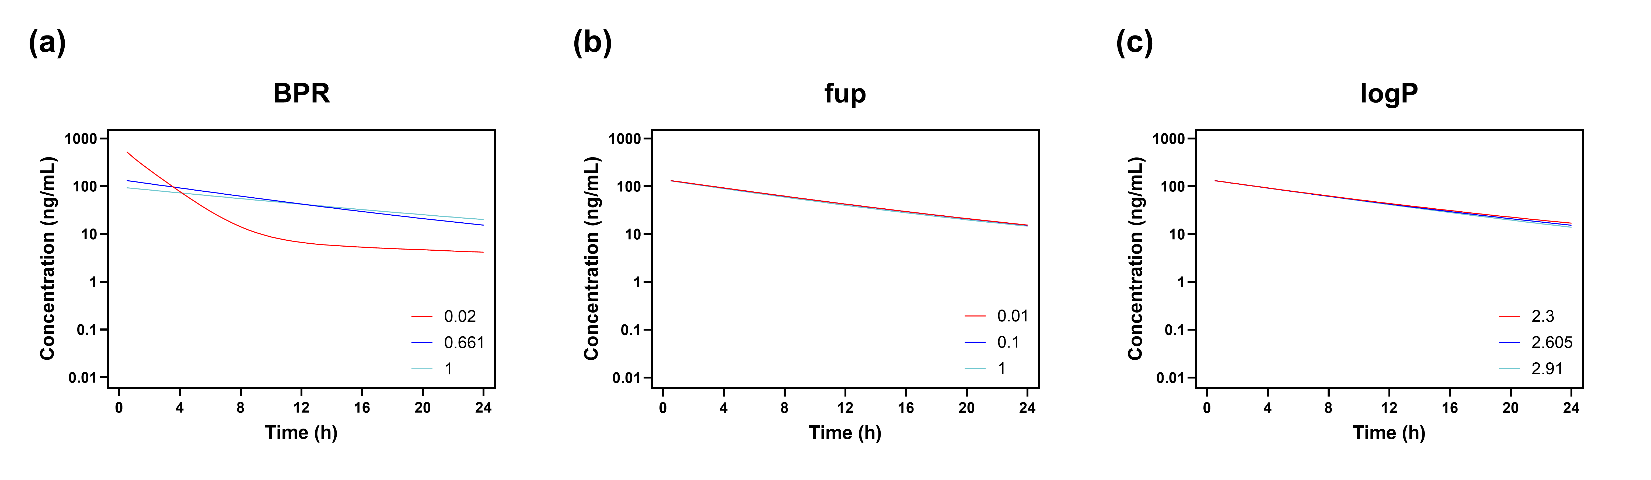
**

**Fig. S5.** Parameter sensitivity analysis of projected human plasma PK for MTMSA-Trp for (a) blood-to-plasma ratio (BPR), (b) fraction unbound in plasma (fup), and (c) lipophilicity (logP). PBPK simulations were conducted at a single 13 µg/kg IV bolus dose in a 13-year-old, 50-kg male using human clearance predicted by allometric scaling (Method 2).
